# Supplementary material for: Heavier carbene analogues and their derivatives as κ-El, κ2-El,N, and κ2-N,N′ ligands: different reactivity patterns for acyclic and cyclic diamidogermylenes and -stannylenes
Source: Royal Society of Chemistry journal article supplement (doi:10.1039/c2dt32443a), 2013-01-01

## Supporting Information

**Heavier carbene analogues and their derivatives as  $\kappa$ -EL,  $\kappa^2$ -EL, N, and  $\kappa^2$ -N, N' ligands:  
Different reactivity patterns for acyclic and cyclic diamidogermynes and -stannylenes**

*Joseph K. West,<sup>a</sup> Gregory L. Fondong,<sup>a</sup> Bruce C. Noll,<sup>b</sup> and Lothar Stahl<sup>a</sup>*

*Department of Chemistry, University of North Dakota, Grand Forks, ND 58201 USA*

*<sup>b</sup>Bruker, AXS Inc., Madison, WI 53711 USA*

Table 1. Crystal data and structure refinement for **E**.

|                                   |                                                                                |                   |
|-----------------------------------|--------------------------------------------------------------------------------|-------------------|
| Identification code               | joe52_0m                                                                       |                   |
| Empirical formula                 | C <sub>24</sub> H <sub>72</sub> Cu <sub>4</sub> N <sub>4</sub> Si <sub>8</sub> |                   |
| Formula weight                    | 223.93                                                                         |                   |
| Temperature                       | 173(2) K                                                                       |                   |
| Wavelength                        | 0.71073 Å                                                                      |                   |
| Crystal system                    | Monoclinic                                                                     |                   |
| Space group                       | P2/n                                                                           |                   |
| Unit cell dimensions              | a = 9.2974(2) Å                                                                | α = 90°.          |
|                                   | b = 13.4245(3) Å                                                               | β = 90.4290(10)°. |
|                                   | c = 17.7591(4) Å                                                               | γ = 90°.          |
| Volume                            | 2216.50(8) Å <sup>3</sup>                                                      |                   |
| Z                                 | 2                                                                              |                   |
| Density (calculated)              | 1.342 Mg/m <sup>3</sup>                                                        |                   |
| Absorption coefficient            | 2.129 mm <sup>-1</sup>                                                         |                   |
| F(000)                            | 944                                                                            |                   |
| Crystal size                      | 0.19 x 0.19 x 0.56 mm <sup>3</sup>                                             |                   |
| Theta range for data collection   | 1.52 to 40.25°.                                                                |                   |
| Index ranges                      | -15 ≤ h ≤ 16, -24 ≤ k ≤ 24, -32 ≤ l ≤ 28                                       |                   |
| Reflections collected             | 49521                                                                          |                   |
| Independent reflections           | 13684 [R(int) = 0.0226]                                                        |                   |
| Completeness to theta = 40.25°    | 98.0 %                                                                         |                   |
| Absorption correction             | SADABS                                                                         |                   |
| Refinement method                 | Full-matrix least-squares on F <sup>2</sup>                                    |                   |
| Data / restraints / parameters    | 13684 / 0 / 194                                                                |                   |
| Goodness-of-fit on F <sup>2</sup> | 1.000                                                                          |                   |
| Final R indices [I > 2σ(I)]       | R1 = 0.0253, wR2 = 0.0645                                                      |                   |
| R indices (all data)              | R1 = 0.0454, wR2 = 0.0742                                                      |                   |
| Largest diff. peak and hole       | 0.551 and -0.483 e.Å <sup>-3</sup>                                             |                   |

Table 2. Atomic coordinates ( $\times 10^4$ ) and equivalent isotropic displacement parameters ( $\text{\AA}^2 \times 10^3$ ) for **E**.  $U(\text{eq})$  is defined as one third of the trace of the orthogonalized  $U^{ij}$  tensor.

|       | x        | y        | z       | $U(\text{eq})$ |
|-------|----------|----------|---------|----------------|
| Cu(1) | 2053(1)  | 3509(1)  | 3218(1) | 17(1)          |
| Cu(2) | 2058(1)  | 1514(1)  | 3220(1) | 17(1)          |
| Si(1) | 4051(1)  | 5206(1)  | 2763(1) | 20(1)          |
| Si(2) | 3983(1)  | -183(1)  | 2848(1) | 27(1)          |
| Si(3) | 2797(1)  | 2597(1)  | 4729(1) | 24(1)          |
| Si(4) | -252(1)  | 2444(1)  | 4139(1) | 21(1)          |
| N(1)  | 2500     | 4535(1)  | 2500    | 18(1)          |
| N(2)  | 2500     | 493(1)   | 2500    | 19(1)          |
| N(3)  | 1606(1)  | 2510(1)  | 3958(1) | 17(1)          |
| C(1)  | 5031(1)  | 5693(1)  | 1919(1) | 34(1)          |
| C(2)  | 3621(1)  | 6288(1)  | 3389(1) | 32(1)          |
| C(3)  | 5336(1)  | 4416(1)  | 3311(1) | 29(1)          |
| C(4)  | 3625(2)  | -658(1)  | 3822(1) | 44(1)          |
| C(5)  | 4452(2)  | -1266(1) | 2231(1) | 50(1)          |
| C(6)  | 5637(1)  | 599(1)   | 2888(1) | 42(1)          |
| C(7)  | 4660(1)  | 2211(1)  | 4475(1) | 35(1)          |
| C(8)  | 2862(1)  | 3906(1)  | 5099(1) | 39(1)          |
| C(9)  | 2270(2)  | 1763(1)  | 5528(1) | 45(1)          |
| C(10) | -1312(1) | 2796(1)  | 3289(1) | 32(1)          |
| C(11) | -808(1)  | 1154(1)  | 4419(1) | 38(1)          |
| C(12) | -831(2)  | 3320(1)  | 4896(1) | 47(1)          |

Table 3. Bond lengths [ $\text{\AA}$ ] and angles [ $^\circ$ ] for **E**.

---

|                     |             |
|---------------------|-------------|
| Cu(1)-N(1)          | 1.9243(6)   |
| Cu(1)-N(3)          | 1.9249(7)   |
| Cu(1)-Cu(2)         | 2.67889(15) |
| Cu(1)-Cu(1)#1       | 2.6891(2)   |
| Cu(2)-N(3)          | 1.9200(7)   |
| Cu(2)-N(2)          | 1.9211(7)   |
| Cu(2)-Cu(2)#1       | 2.6930(2)   |
| Si(1)-N(1)          | 1.7601(5)   |
| Si(1)-C(3)          | 1.8661(10)  |
| Si(1)-C(2)          | 1.8748(10)  |
| Si(1)-C(1)          | 1.8768(10)  |
| Si(2)-N(2)          | 1.7590(5)   |
| Si(2)-C(6)          | 1.8625(13)  |
| Si(2)-C(5)          | 1.8749(12)  |
| Si(2)-C(4)          | 1.8759(12)  |
| Si(3)-N(3)          | 1.7586(8)   |
| Si(3)-C(7)          | 1.8664(12)  |
| Si(3)-C(9)          | 1.8752(12)  |
| Si(3)-C(8)          | 1.8770(12)  |
| Si(4)-N(3)          | 1.7620(8)   |
| Si(4)-C(10)         | 1.8584(11)  |
| Si(4)-C(12)         | 1.8682(11)  |
| Si(4)-C(11)         | 1.8749(11)  |
| N(1)-Si(1)#1        | 1.7601(5)   |
| N(1)-Cu(1)#1        | 1.9243(6)   |
| N(2)-Si(2)#1        | 1.7590(5)   |
| N(2)-Cu(2)#1        | 1.9211(7)   |
|                     |             |
| N(1)-Cu(1)-N(3)     | 178.48(3)   |
| N(1)-Cu(1)-Cu(2)    | 135.720(19) |
| N(3)-Cu(1)-Cu(2)    | 45.76(2)    |
| N(1)-Cu(1)-Cu(1)#1  | 45.677(19)  |
| N(3)-Cu(1)-Cu(1)#1  | 135.80(2)   |
| Cu(2)-Cu(1)-Cu(1)#1 | 90.042(3)   |

|                      |             |
|----------------------|-------------|
| N(3)-Cu(2)-N(2)      | 178.63(3)   |
| N(3)-Cu(2)-Cu(1)     | 45.91(2)    |
| N(2)-Cu(2)-Cu(1)     | 135.46(2)   |
| N(3)-Cu(2)-Cu(2)#1   | 135.87(2)   |
| N(2)-Cu(2)-Cu(2)#1   | 45.500(19)  |
| Cu(1)-Cu(2)-Cu(2)#1  | 89.957(3)   |
| N(1)-Si(1)-C(3)      | 111.57(4)   |
| N(1)-Si(1)-C(2)      | 112.07(4)   |
| C(3)-Si(1)-C(2)      | 105.62(5)   |
| N(1)-Si(1)-C(1)      | 111.61(4)   |
| C(3)-Si(1)-C(1)      | 107.57(5)   |
| C(2)-Si(1)-C(1)      | 108.09(5)   |
| N(2)-Si(2)-C(6)      | 111.53(5)   |
| N(2)-Si(2)-C(5)      | 112.34(6)   |
| C(6)-Si(2)-C(5)      | 105.27(7)   |
| N(2)-Si(2)-C(4)      | 110.85(4)   |
| C(6)-Si(2)-C(4)      | 107.99(6)   |
| C(5)-Si(2)-C(4)      | 108.60(6)   |
| N(3)-Si(3)-C(7)      | 111.93(5)   |
| N(3)-Si(3)-C(9)      | 112.57(5)   |
| C(7)-Si(3)-C(9)      | 105.37(6)   |
| N(3)-Si(3)-C(8)      | 110.69(5)   |
| C(7)-Si(3)-C(8)      | 108.43(6)   |
| C(9)-Si(3)-C(8)      | 107.57(6)   |
| N(3)-Si(4)-C(10)     | 110.66(4)   |
| N(3)-Si(4)-C(12)     | 112.88(5)   |
| C(10)-Si(4)-C(12)    | 105.69(6)   |
| N(3)-Si(4)-C(11)     | 111.57(5)   |
| C(10)-Si(4)-C(11)    | 107.73(5)   |
| C(12)-Si(4)-C(11)    | 108.01(6)   |
| Si(1)-N(1)-Si(1)#1   | 118.44(5)   |
| Si(1)-N(1)-Cu(1)     | 111.783(13) |
| Si(1)#1-N(1)-Cu(1)   | 111.172(13) |
| Si(1)-N(1)-Cu(1)#1   | 111.172(13) |
| Si(1)#1-N(1)-Cu(1)#1 | 111.783(13) |
| Cu(1)-N(1)-Cu(1)#1   | 88.65(4)    |

|                      |             |
|----------------------|-------------|
| Si(2)-N(2)-Si(2)#1   | 117.87(5)   |
| Si(2)-N(2)-Cu(2)     | 107.753(14) |
| Si(2)#1-N(2)-Cu(2)   | 115.541(13) |
| Si(2)-N(2)-Cu(2)#1   | 115.541(13) |
| Si(2)#1-N(2)-Cu(2)#1 | 107.753(14) |
| Cu(2)-N(2)-Cu(2)#1   | 89.00(4)    |
| Si(3)-N(3)-Si(4)     | 118.21(4)   |
| Si(3)-N(3)-Cu(2)     | 115.96(4)   |
| Si(4)-N(3)-Cu(2)     | 108.05(4)   |
| Si(3)-N(3)-Cu(1)     | 110.32(4)   |
| Si(4)-N(3)-Cu(1)     | 112.14(4)   |
| Cu(2)-N(3)-Cu(1)     | 88.33(3)    |

---

Symmetry transformations used to generate equivalent atoms:

#1  $-x+1/2, y, -z+1/2$

Table 4. Anisotropic displacement parameters ( $\text{\AA}^2 \times 10^3$ ) for **E**. The anisotropic displacement factor exponent takes the form:  $-2\pi^2 [ h^2 a^{*2} U^{11} + \dots + 2 h k a^* b^* U^{12} ]$

|       | U <sup>11</sup> | U <sup>22</sup> | U <sup>33</sup> | U <sup>23</sup> | U <sup>13</sup> | U <sup>12</sup> |
|-------|-----------------|-----------------|-----------------|-----------------|-----------------|-----------------|
| Cu(1) | 20(1)           | 16(1)           | 14(1)           | 1(1)            | 0(1)            | 0(1)            |
| Cu(2) | 18(1)           | 16(1)           | 17(1)           | 0(1)            | 2(1)            | 1(1)            |
| Si(1) | 24(1)           | 17(1)           | 19(1)           | 0(1)            | -1(1)           | -2(1)           |
| Si(2) | 26(1)           | 23(1)           | 32(1)           | 8(1)            | 9(1)            | 7(1)            |
| Si(3) | 25(1)           | 30(1)           | 16(1)           | 3(1)            | -3(1)           | -1(1)           |
| Si(4) | 20(1)           | 25(1)           | 17(1)           | 0(1)            | 3(1)            | 1(1)            |
| N(1)  | 23(1)           | 14(1)           | 16(1)           | 0               | 0(1)            | 0               |
| N(2)  | 22(1)           | 14(1)           | 22(1)           | 0               | 5(1)            | 0               |
| N(3)  | 20(1)           | 19(1)           | 13(1)           | 1(1)            | 1(1)            | 1(1)            |
| C(1)  | 37(1)           | 34(1)           | 32(1)           | 6(1)            | 6(1)            | -7(1)           |
| C(2)  | 42(1)           | 23(1)           | 32(1)           | -9(1)           | -4(1)           | 0(1)            |
| C(3)  | 30(1)           | 30(1)           | 29(1)           | 0(1)            | -6(1)           | 3(1)            |
| C(4)  | 49(1)           | 42(1)           | 40(1)           | 21(1)           | 8(1)            | 9(1)            |
| C(5)  | 57(1)           | 29(1)           | 65(1)           | 2(1)            | 26(1)           | 18(1)           |
| C(6)  | 24(1)           | 59(1)           | 43(1)           | 13(1)           | 2(1)            | -1(1)           |
| C(7)  | 27(1)           | 38(1)           | 39(1)           | 8(1)            | -4(1)           | 3(1)            |
| C(8)  | 45(1)           | 43(1)           | 31(1)           | -14(1)          | -5(1)           | -3(1)           |
| C(9)  | 45(1)           | 66(1)           | 24(1)           | 20(1)           | -4(1)           | -5(1)           |
| C(10) | 26(1)           | 36(1)           | 34(1)           | 6(1)            | -7(1)           | 2(1)            |
| C(11) | 37(1)           | 39(1)           | 37(1)           | 12(1)           | 3(1)            | -9(1)           |
| C(12) | 40(1)           | 62(1)           | 38(1)           | -21(1)          | 12(1)           | 7(1)            |

Table 5. Hydrogen coordinates ( $\times 10^4$ ) and isotropic displacement parameters ( $\text{\AA}^2 \times 10^3$ ) for **E**.

|        | x     | y     | z    | U(eq) |
|--------|-------|-------|------|-------|
| H(1A)  | 5175  | 5150  | 1558 | 51    |
| H(1B)  | 5966  | 5959  | 2077 | 51    |
| H(1C)  | 4462  | 6222  | 1681 | 51    |
| H(2A)  | 2964  | 6743  | 3124 | 48    |
| H(2B)  | 4510  | 6642  | 3519 | 48    |
| H(2C)  | 3164  | 6046  | 3849 | 48    |
| H(3A)  | 4968  | 4317  | 3821 | 44    |
| H(3B)  | 6274  | 4748  | 3338 | 44    |
| H(3C)  | 5442  | 3769  | 3062 | 44    |
| H(4A)  | 3293  | -109  | 4140 | 65    |
| H(4B)  | 4512  | -938  | 4036 | 65    |
| H(4C)  | 2884  | -1177 | 3800 | 65    |
| H(5A)  | 3634  | -1726 | 2203 | 75    |
| H(5B)  | 5289  | -1614 | 2442 | 75    |
| H(5C)  | 4679  | -1026 | 1724 | 75    |
| H(6A)  | 5997  | 703   | 2377 | 63    |
| H(6B)  | 6373  | 261   | 3191 | 63    |
| H(6C)  | 5409  | 1244  | 3116 | 63    |
| H(7A)  | 4693  | 1486  | 4412 | 52    |
| H(7B)  | 5328  | 2410  | 4877 | 52    |
| H(7C)  | 4936  | 2535  | 4004 | 52    |
| H(8A)  | 2948  | 4372  | 4677 | 59    |
| H(8B)  | 3695  | 3981  | 5436 | 59    |
| H(8C)  | 1979  | 4048  | 5376 | 59    |
| H(9A)  | 1323  | 1961  | 5714 | 67    |
| H(9B)  | 2982  | 1821  | 5936 | 67    |
| H(9C)  | 2232  | 1072  | 5353 | 67    |
| H(10A) | -1288 | 3522  | 3226 | 48    |
| H(10B) | -2310 | 2576  | 3348 | 48    |
| H(10C) | -896  | 2477  | 2844 | 48    |



|        |       |      |      |    |
|--------|-------|------|------|----|
| H(11A) | -514  | 680  | 4029 | 56 |
| H(11B) | -1856 | 1130 | 4474 | 56 |
| H(11C) | -347  | 978  | 4898 | 56 |
| H(12A) | -413  | 3109 | 5379 | 70 |
| H(12B) | -1883 | 3314 | 4930 | 70 |
| H(12C) | -502  | 3994 | 4777 | 70 |

---

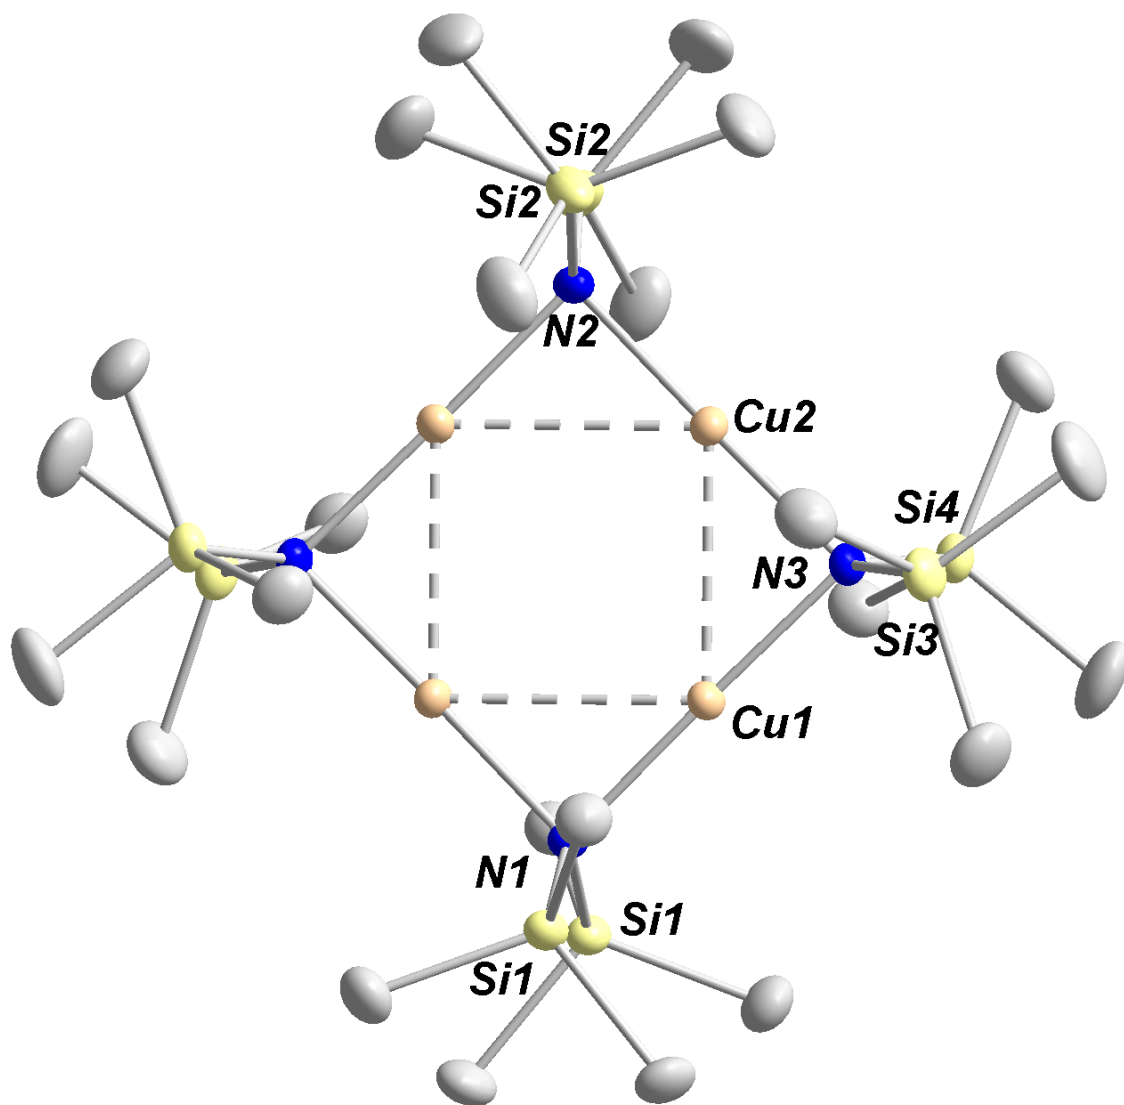

Supplement: c2dt32443a.pdf [file c2dt32443a.pdf]
